# Supplementary material for: Diagnostic Trends and Clinical Characteristics of Eosinophilic Esophagitis: A Korean, Single-center Database Study
Source: PubMed Central journal article supplement — J Neurogastroenterol Motil. 2018 Apr 1;24(2):248–54. doi: 10.5056/jnm17047 (PMC5885724; doi:10.5056/jnm17047), 2018-04-01
Supplement: jnm-24-248_suppl.pdf [file jnm-24-248_suppl.pdf]

**Supplementary Table 1.** Epidemiologic Analysis of the Patients Included the Study

|                             | Study patients (n = 18 362) | EoE (n = 37)       |
|-----------------------------|-----------------------------|--------------------|
| Sex (M:F)                   | 12 583 (68.5):5779 (31.5)   | 29 (78.4):8 (21.6) |
| Median age in years (range) | 58.1 (50.0-68.0)            | 44.0 (32.0-53.5)   |
| Pathology result            |                             |                    |
| Carcinoma                   | 1996 (10.8)                 |                    |
| Barret's esophagus          | 1367 (7.4)                  |                    |
| Candida esophagitis         | 1878 (10.2)                 |                    |
| Miscellaneous               | 13 121 (71.4)               |                    |

EoE, eosinophilic esophagitis; M, male; F, female.

Data represent numbers of patients (%).

**Supplementary Table 2.** Prevalence of Eosinophilic Esophagitis and Esophageal Eosinophilia in Korea

| Author (publication year)     | Study design                 | Study population                           | EoE/EE | No. of subjects | Cut-off for eosinophil count | No. of patients with EoE or EE | Prevalence of EoE (%) | Sex (M:F) | Mean age in years (range) |
|-------------------------------|------------------------------|--------------------------------------------|--------|-----------------|------------------------------|--------------------------------|-----------------------|-----------|---------------------------|
| Yu et al, <sup>2</sup> 2009   | Prospective, single center   | Patients with dysphagia and reflux symptom | EoE    | 108             | 15/HHPF                      | 2                              | 1.8                   | 2:0       | 35.5 (28.0-43.0)          |
| Joo et al, <sup>3</sup> 2012  | Prospective, single center   | Patients with esophageal and UGI symptoms  | EoE    | 122             | 15/HHPF                      | 8                              | 6.6                   | 5:3       | 51.1 (25.0-61.0)          |
| Lee et al, <sup>4</sup> 2013  | Retrospective, multi center  | Patients with esophageal biopsy            | EoE    | -               | 15/HHPF                      | 9                              | -                     | 6:3       | 36.4 (8.0-60.0)           |
| Jung et al, <sup>5</sup> 2016 | Retrospective, multi center  | Patients with esophageal biopsy            | EE     | -               | 15/HHPF                      | 6                              | -                     | 5:1       | 33.5 (19.0-54.0)          |
| Ahn et al, <sup>6</sup> 2016  | Retrospective, single center | Patients with esophageal biopsy            | EE     | 4075            | 15/HHPF                      | 13                             | 0.3                   | 6:9       | 55.0 ± 20.2               |

EoE, eosinophilic esophagitis; EE, esophageal eosinophilia; M, male; F, female; UGI, upper gastrointestinal; HHPF, high-power field.

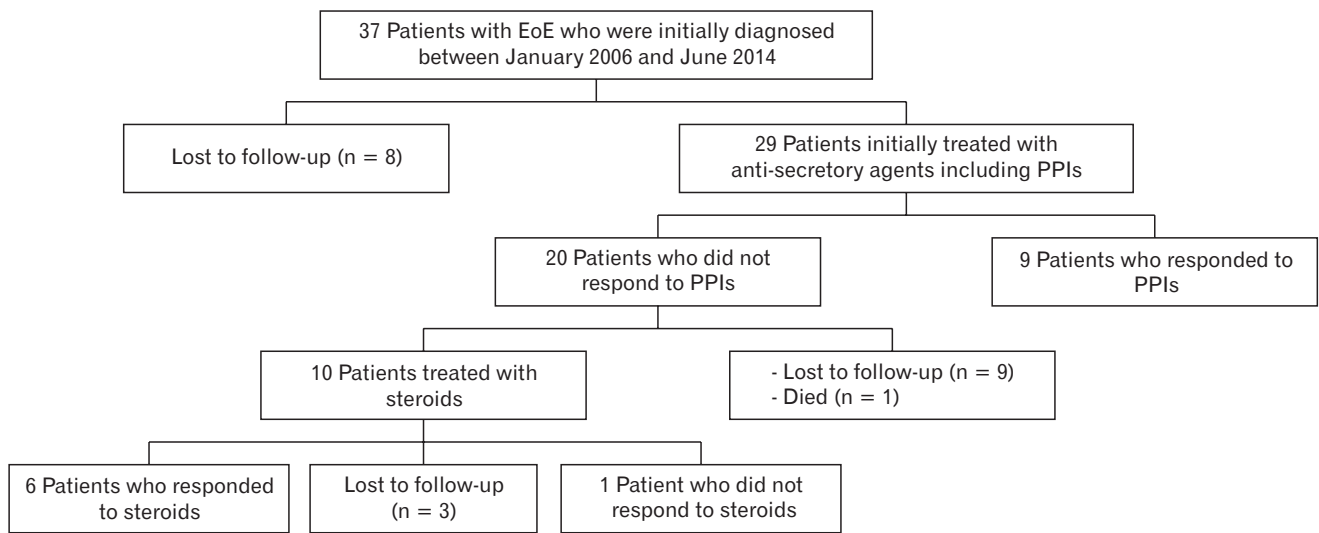

**Supplementary Figure.** Clinical outcomes of 37 patients with eosinophilic esophagitis. EoE, eosinophilic esophagitis; PPIs, proton pump inhibitors.
